# Supplementary material
Source: ML conference proceedings conference paper supplement (https://openaccess.thecvf.com/content/CVPR_2020/html/Wu_Exploring_Bottom-Up_and_CVPR_2020_paper.html)
Supplement: Supplementary file 1 [file Wu_Exploring_Bottom-Up_and_CVPR_2020_supplemental.pdf]

# Supplementary Material for “Exploring Bottom-up and Top-down Cues with Attentive Learning for Webly Supervised Object Detection”

Zhonghua Wu<sup>1</sup> Qingyi Tao<sup>1,2</sup> Guosheng Lin<sup>\*1</sup> Jianfei Cai<sup>1,3</sup>

<sup>1</sup>Nanyang Technological University <sup>2</sup>NVIDIA AI Technology Center <sup>3</sup>Monash University

{zhonghua001, qtao002}@e.ntu.edu.sg {gslin}@ntu.edu.sg {jianfei.cai}@monash.edu

## 1. Detail results on PASCAL VOC dataset

We show the comparison results in Table A, B and C. The bottom parts of Tables show the AP results of each category for our proposed webly supervised object detection (WebSOD) and its variants under the three different novel/base class splits.

Table A. Object detection performance (AP) for the 1st split of the novel and base categories on the PASCAL VOC 2007 dataset.

| Methods               | Novel       |             |             |             |             |             | Base |      |      |        |      |      |       |       |      |       |        |       |       |       |      |      |
|-----------------------|-------------|-------------|-------------|-------------|-------------|-------------|------|------|------|--------|------|------|-------|-------|------|-------|--------|-------|-------|-------|------|------|
|                       | bird        | bus         | cow         | mbike       | sofa        | mean        | aero | bike | boat | bottle | car  | cat  | chair | table | dog  | horse | person | plant | sheep | train | tv   | mean |
| ZAOD [3]              | 17.8        | 42.9        | 20.3        | 43.8        | 37.3        | 32.4        | 40.6 | 30.1 | 15.9 | 6.4    | 40.5 | 31.5 | 11.4  | 27.4  | 15.7 | 24.1  | 8.9    | 12.2  | 17.7  | 32.1  | 31.0 | 23.0 |
| WSDDN [1]             | 31.5        | 64.5        | 35.7        | 55.6        | 40.7        | 45.6        | 39.4 | 50.1 | 16.3 | 12.6   | 42.8 | 42.6 | 10.1  | 24.9  | 38.2 | 34.4  | 9.4    | 14.7  | 30.2  | 54.7  | 46.9 | 31.6 |
| ZLDN [5]              | 50.1        | 62.7        | 57.8        | 68.2        | 56.1        | 58.9        | 55.4 | 68.5 | 16.8 | 20.8   | 66.8 | 56.5 | 2.1   | 47.5  | 40.1 | 69.7  | 21.6   | 27.2  | 53.4  | 52.5  | 58.2 | 43.8 |
| WSOD <sup>2</sup> [4] | 61.5        | 73.4        | 71.9        | 71.4        | 60.9        | 67.8        | 68.2 | 70.7 | 42.3 | 28.0   | 69.3 | 52.3 | 32.7  | 42.8  | 57.9 | 73.8  | 25.5   | 29.2  | 61.6  | 56.5  | 70.7 | 52.1 |
| Few Shot [2]          | 30.0        | 62.7        | 43.2        | 60.6        | 39.6        | 47.2        | 65.3 | 73.5 | 54.7 | 39.5   | 75.7 | 81.1 | 35.3  | 62.5  | 72.8 | 78.8  | 68.6   | 41.5  | 59.2  | 76.2  | 69.2 | 63.6 |
| Base WebSOD           | 50.1        | 61.9        | 78.1        | 56.2        | 45.0        | 58.3        | 66.6 | 73.7 | 59.7 | 60.1   | 78.0 | 85.0 | 44.8  | 63.0  | 79.5 | 75.6  | 75.4   | 41.1  | 73.1  | 76.0  | 62.8 | 67.6 |
| WebSOD + ACL          | 52.5        | 63.3        | 79.5        | <b>58.3</b> | <b>48.7</b> | 60.5        | 67.4 | 76.3 | 61.0 | 60.7   | 80.0 | 82.9 | 46.1  | 61.9  | 81.0 | 78.7  | 75.7   | 45.5  | 74.2  | 77.6  | 65.9 | 69.0 |
| WebSOD + ACL + FT     | 56.6        | 60.9        | 73.9        | 54.8        | 44.8        | 58.2        | 78.9 | 83.7 | 67.6 | 67.0   | 83.9 | 86.0 | 54.2  | 70.9  | 81.8 | 84.1  | 77.6   | 48.7  | 78.7  | 81.0  | 74.9 | 74.6 |
| WebSOD + ACL + RFR    | <b>56.8</b> | <b>66.2</b> | <b>80.3</b> | 57.3        | 48.2        | <b>61.8</b> | 69.9 | 76.2 | 61.0 | 60.6   | 82.9 | 84.6 | 48.7  | 64.4  | 82.5 | 80.8  | 76.5   | 46.0  | 76.6  | 80.8  | 68.8 | 70.7 |
| Fully Supervised      | 79.1        | 86.1        | 85.8        | 84.8        | 79.8        | 83.1        | 79.4 | 85.7 | 72.0 | 68.4   | 87.7 | 88.4 | 63.0  | 71.0  | 87.8 | 86.9  | 82.3   | 52.1  | 82.1  | 87.1  | 76.9 | 78.1 |

Table B. Object detection performance (AP) for the 2nd split of the novel and base categories on the PASCAL VOC 2007 dataset.

| Methods               | Novel       |             |             |             |             | Base        |      |      |      |      |      |      |       |       |      |       |        |       |       |       |      |      |
|-----------------------|-------------|-------------|-------------|-------------|-------------|-------------|------|------|------|------|------|------|-------|-------|------|-------|--------|-------|-------|-------|------|------|
|                       | aero        | bottle      | cow         | horse       | sofa        | mean        | bike | bird | boat | bus  | car  | cat  | chair | table | dog  | mbike | person | plant | sheep | train | tv   | mean |
| ZAOD [3]              | 40.6        | 6.4         | 20.3        | 24.1        | 37.3        | 25.7        | 30.1 | 17.8 | 15.9 | 42.9 | 40.5 | 31.5 | 11.4  | 27.4  | 15.7 | 43.8  | 8.9    | 12.2  | 17.7  | 32.1  | 31.0 | 25.3 |
| WSDDN [1]             | 39.4        | 12.6        | 35.7        | 34.4        | 40.7        | 32.6        | 50.1 | 31.5 | 16.3 | 64.5 | 42.8 | 42.6 | 10.1  | 24.9  | 38.2 | 55.6  | 9.4    | 14.7  | 30.2  | 54.7  | 46.9 | 35.5 |
| ZLDN [5]              | 55.4        | 20.8        | 57.8        | 69.7        | 56.1        | 51.9        | 68.5 | 50.1 | 16.8 | 62.7 | 66.8 | 56.5 | 2.1   | 47.5  | 40.1 | 68.2  | 21.6   | 27.2  | 53.4  | 52.5  | 58.2 | 46.1 |
| WSOD <sup>2</sup> [4] | 68.2        | 28.0        | 71.9        | 73.8        | 60.9        | 60.6        | 70.7 | 61.5 | 42.3 | 73.4 | 69.3 | 52.3 | 32.7  | 42.8  | 57.9 | 71.4  | 25.5   | 29.2  | 61.6  | 56.5  | 70.7 | 54.5 |
| Few Shot [2]          | 43.2        | 13.9        | 41.5        | 58.1        | 39.2        | 39.2        | 74.1 | 63.8 | 52.0 | 75.5 | 77.6 | 81.8 | 35.6  | 57.9  | 68.2 | 77.6  | 68.0   | 37.9  | 62.4  | 76.9  | 71.3 | 65.4 |
| Base WebSOD           | 50.0        | 9.3         | 80.5        | <b>75.9</b> | 45.3        | 52.2        | 72.2 | 74.3 | 58.8 | 83.0 | 83.2 | 84.2 | 41.9  | 63.1  | 82.2 | 73.5  | 75.4   | 41.8  | 75.9  | 78.5  | 63.3 | 70.1 |
| WebSOD + ACL          | 52.8        | 10.3        | 80.8        | 74.3        | 46.9        | 53.0        | 74.5 | 74.4 | 62.1 | 81.9 | 85.0 | 87.0 | 45.2  | 64.2  | 81.4 | 74.0  | 75.5   | 42.8  | 76.9  | 78.4  | 64.6 | 71.2 |
| WebSOD + ACL + RFR    | <b>53.5</b> | <b>10.6</b> | <b>81.2</b> | 74.4        | <b>50.2</b> | <b>54.0</b> | 76.4 | 75.3 | 61.6 | 81.7 | 86.0 | 87.5 | 48.2  | 64.9  | 82.9 | 76.5  | 76.1   | 43.6  | 78.0  | 80.8  | 67.5 | 72.5 |
| Fully Supervised      | 79.4        | 68.4        | 85.8        | 86.9        | 79.8        | 80.6        | 85.7 | 79.1 | 72.0 | 86.1 | 87.7 | 88.4 | 63.0  | 71.0  | 87.8 | 84.8  | 82.3   | 52.1  | 82.1  | 87.1  | 76.9 | 79.1 |

Table C. Object detection performance (AP) for the 3rd split of the novel and base categories on the PASCAL VOC 2007 dataset.

| Methods               | Novel       |             |             |             |             |             | Base |      |      |        |      |      |       |      |       |      |       |        |       |       |      |      |
|-----------------------|-------------|-------------|-------------|-------------|-------------|-------------|------|------|------|--------|------|------|-------|------|-------|------|-------|--------|-------|-------|------|------|
|                       | boat        | cat         | mbike       | sheep       | sofa        | mean        | aero | bike | bird | bottle | bus  | car  | chair | cow  | table | dog  | horse | person | plant | train | tv   | mean |
| ZAOD [3]              | 15.9        | 31.5        | 43.8        | 17.7        | 37.3        | 29.2        | 40.6 | 30.1 | 17.8 | 6.4    | 34.4 | 24.2 | 5.7   | 20.3 | 22.3  | 24.9 | 29.1  | 7.8    | 9.4   | 22.6  | 26.0 | 21.4 |
| WSDDN [1]             | 16.3        | 42.6        | 55.6        | 30.2        | 40.7        | 37.1        | 39.4 | 50.1 | 31.5 | 12.6   | 64.5 | 42.8 | 10.1  | 35.7 | 24.9  | 38.2 | 34.4  | 9.4    | 14.7  | 54.7  | 46.9 | 34.0 |
| ZLDN [5]              | 16.8        | 56.5        | 68.2        | 53.4        | 56.1        | 50.2        | 55.4 | 68.5 | 50.1 | 20.8   | 62.7 | 66.8 | 2.1   | 57.8 | 47.5  | 40.1 | 69.7  | 21.6   | 27.2  | 52.5  | 58.2 | 46.7 |
| WSOD <sup>2</sup> [4] | 42.3        | 52.3        | 71.4        | 61.6        | 60.9        | 57.7        | 68.2 | 70.7 | 61.5 | 28.0   | 73.4 | 69.3 | 32.7  | 71.9 | 42.8  | 57.9 | 73.8  | 25.5   | 29.2  | 56.5  | 70.7 | 55.5 |
| Few Shot [2]          | 20.1        | 51.8        | 55.6        | 42.4        | 36.6        | 41.3        | 68.4 | 71.4 | 66.6 | 37.0   | 75.0 | 76.2 | 35.7  | 52.6 | 60.6  | 66.7 | 79.7  | 68.9   | 40.7  | 76.5  | 68.6 | 63.0 |
| Base WebSOD           | 32.5        | <b>80.7</b> | 56.3        | 67.8        | 52.5        | 58.0        | 64.6 | 65.0 | 71.8 | 57.5   | 82.4 | 83.0 | 42.5  | 79.5 | 48.9  | 76.8 | 77.0  | 73.7   | 42.0  | 77.1  | 65.6 | 67.2 |
| WebSOD + ACL          | 30.9        | 77.7        | 58.9        | 72.9        | <b>53.8</b> | 58.9        | 66.2 | 68.6 | 71.0 | 54.1   | 78.0 | 83.3 | 38.1  | 82.3 | 53.3  | 79.2 | 77.6  | 73.6   | 43.4  | 73.7  | 67.4 | 67.3 |
| WebSOD + ACL + RFR    | <b>35.6</b> | 78.0        | <b>59.7</b> | <b>75.1</b> | 51.7        | <b>60.0</b> | 70.9 | 70.5 | 74.1 | 54.0   | 82.7 | 85.4 | 43.3  | 83.4 | 60.1  | 81.3 | 79.9  | 75.5   | 45.0  | 81.2  | 69.7 | 70.5 |
| Fully Supervised      | 72.0        | 88.4        | 84.8        | 82.1        | 79.8        | 81.4        | 79.4 | 85.7 | 79.1 | 68.4   | 86.1 | 87.7 | 63.0  | 85.8 | 71.0  | 87.8 | 86.9  | 82.3   | 52.1  | 87.1  | 76.9 | 79.3 |

## References

- [1] Hakan Bilen and Andrea Vedaldi. Weakly supervised deep detection networks. In *Proceedings of the IEEE Conference on Computer Vision and Pattern Recognition*, pages 2846–2854, 2016.

\*Corresponding author: G. Lin (e-mail: gslin@ntu.edu.sg)

- [2] Bingyi Kang, Zhuang Liu, Xin Wang, Fisher Yu, Jiashi Feng, and Trevor Darrell. Few-shot object detection via feature reweighting. *arXiv preprint arXiv:1812.01866*, 2018.
- [3] Qingyi Tao, Hao Yang, and Jianfei Cai. Zero-annotation object detection with web knowledge transfer. In *Proceedings of the European Conference on Computer Vision (ECCV)*, pages 369–384, 2018.
- [4] Zhaoyang Zeng, Bei Liu, Jianlong Fu, Hongyang Chao, and Lei Zhang. Wsod2: Learning bottom-up and top-down objectness distillation for weakly-supervised object detection. In *Proceedings of the IEEE International Conference on Computer Vision*, pages 8292–8300, 2019.
- [5] Xiaopeng Zhang, Jiashi Feng, Hongkai Xiong, and Qi Tian. Zigzag learning for weakly supervised object detection. In *Proceedings of the IEEE Conference on Computer Vision and Pattern Recognition*, pages 4262–4270, 2018.
